# Supplementary material for: Oromucosal Alginate Films with Zein Nanoparticles as a Novel Delivery System for Digoxin
Source: MDPI journal article supplement (doi:10.3390/pharmaceutics13122030), 2021-11-29
Supplement: s1 [file s1]

# Supplementary Materials: Oromucosal Alginate Films with Zein Nanoparticles as a Novel Delivery System for Digoxin

Daniela A. Rodrigues, Sónia P. Miguel, Jorge Loureiro, Maximiano Ribeiro, Fátima Roque and Paula Coutinho

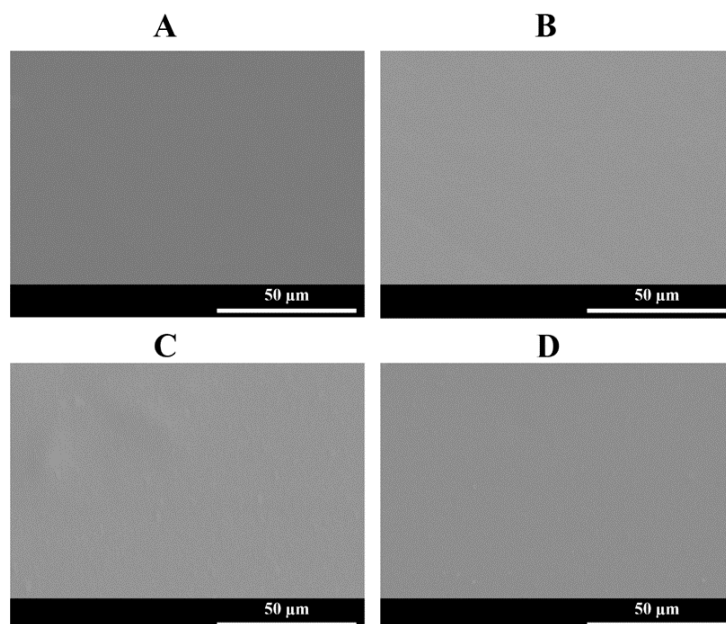

**Figure S1.** SEM micrographs of films morphology (SA: Sodium alginate, EtOH: Ethanol, Glyc: Glycerol). (A) SA\_EtOH0. (B) SA\_EtOH10. (C) SA\_Glyc\_EtOH0. (D) SA\_Glyc\_EtOH10.
